# Supplementary material for: Limits of Peripheral Blood Mononuclear Cells for Gene Expression-Based Biomarkers in Juvenile Idiopathic Arthritis
Source: PubMed Central journal article supplement (PMC4935846; doi:10.1038/srep29477), 2016-07-07
Supplement: srep29477-s1.pdf [file srep29477-s1.pdf]

## Supplementary Information

### Limits of Peripheral Blood Mononuclear Cells for Gene Expression-Based Biomarkers in Juvenile Idiopathic Arthritis

Laiping Wong<sup>1</sup>, Kaiyu Jiang<sup>1</sup>, Yanmin Chen<sup>1</sup>, Teresa Hennon<sup>1</sup>, Lucy Holmes<sup>1</sup>, Carol A. Wallace<sup>3</sup>, James N. Jarvis<sup>1,2</sup>

<sup>1</sup> Department of Pediatrics, University at Buffalo, Buffalo, NY

<sup>2</sup> Genetics, Genomics, & Bioinformatics Program, University at Buffalo, Buffalo, NY

<sup>3</sup> Department of Pediatrics, University of Washington, Seattle, WA

#### Email addresses

Laiping Wong: laipingw@buffalo.edu

Kaiyu Jiang: kaiyujia@buffalo.edu

Yanmin Chen: yanminch@buffalo.edu

Teresa Hennon: trussell@buffalo.edu

Lucy Holmes: luholmes@buffalo.edu

Carol Wallace: cwallace@u.washington.edu

James N. Jarvis: jamesjar@buffalo.edu

Corresponding author: James N. Jarvis, M.D., University at Buffalo Clinical & Translational Research Center R8026, 875 Ellicott Street, Buffalo, NY 14203.

Email: jamesjar@buffalo.edu

**a**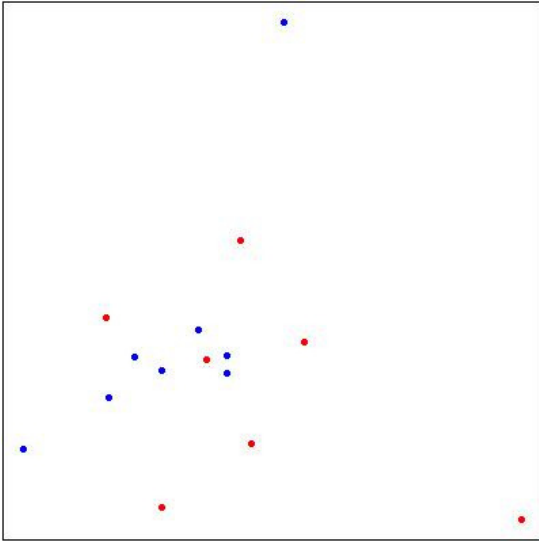**b**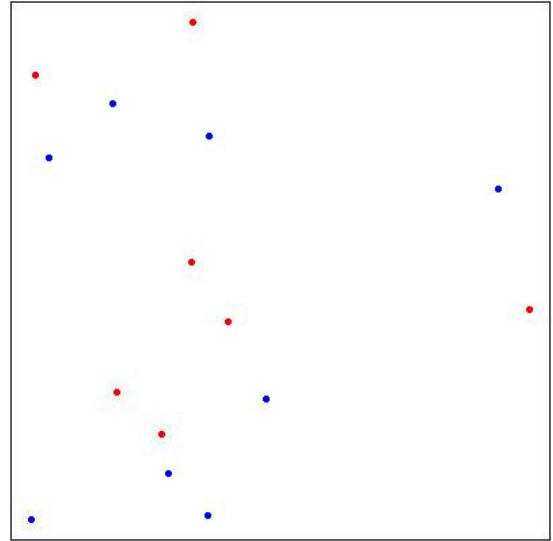**c**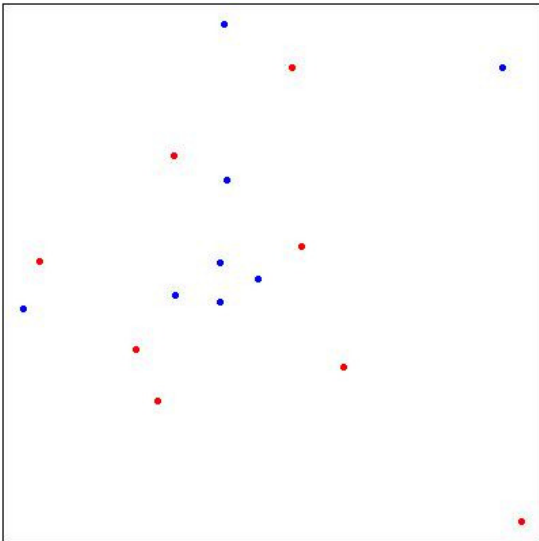**d**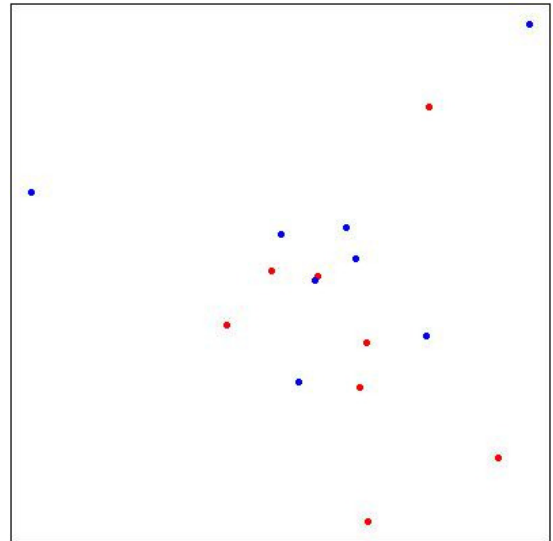

**Supplementary Figure 1.** Multidimensional scaling analysis plot for cohort A samples for the comparison of (a) ADU (red) versus HC (blue), (b) ADU (red) versus ADT (blue), (c) ADT (red) versus HC (blue), (d) CRM (red) versus HC (blue). Samples are randomly scattered with no distinguishable clusters between the observed paired group for all paired group comparison in cohort A.

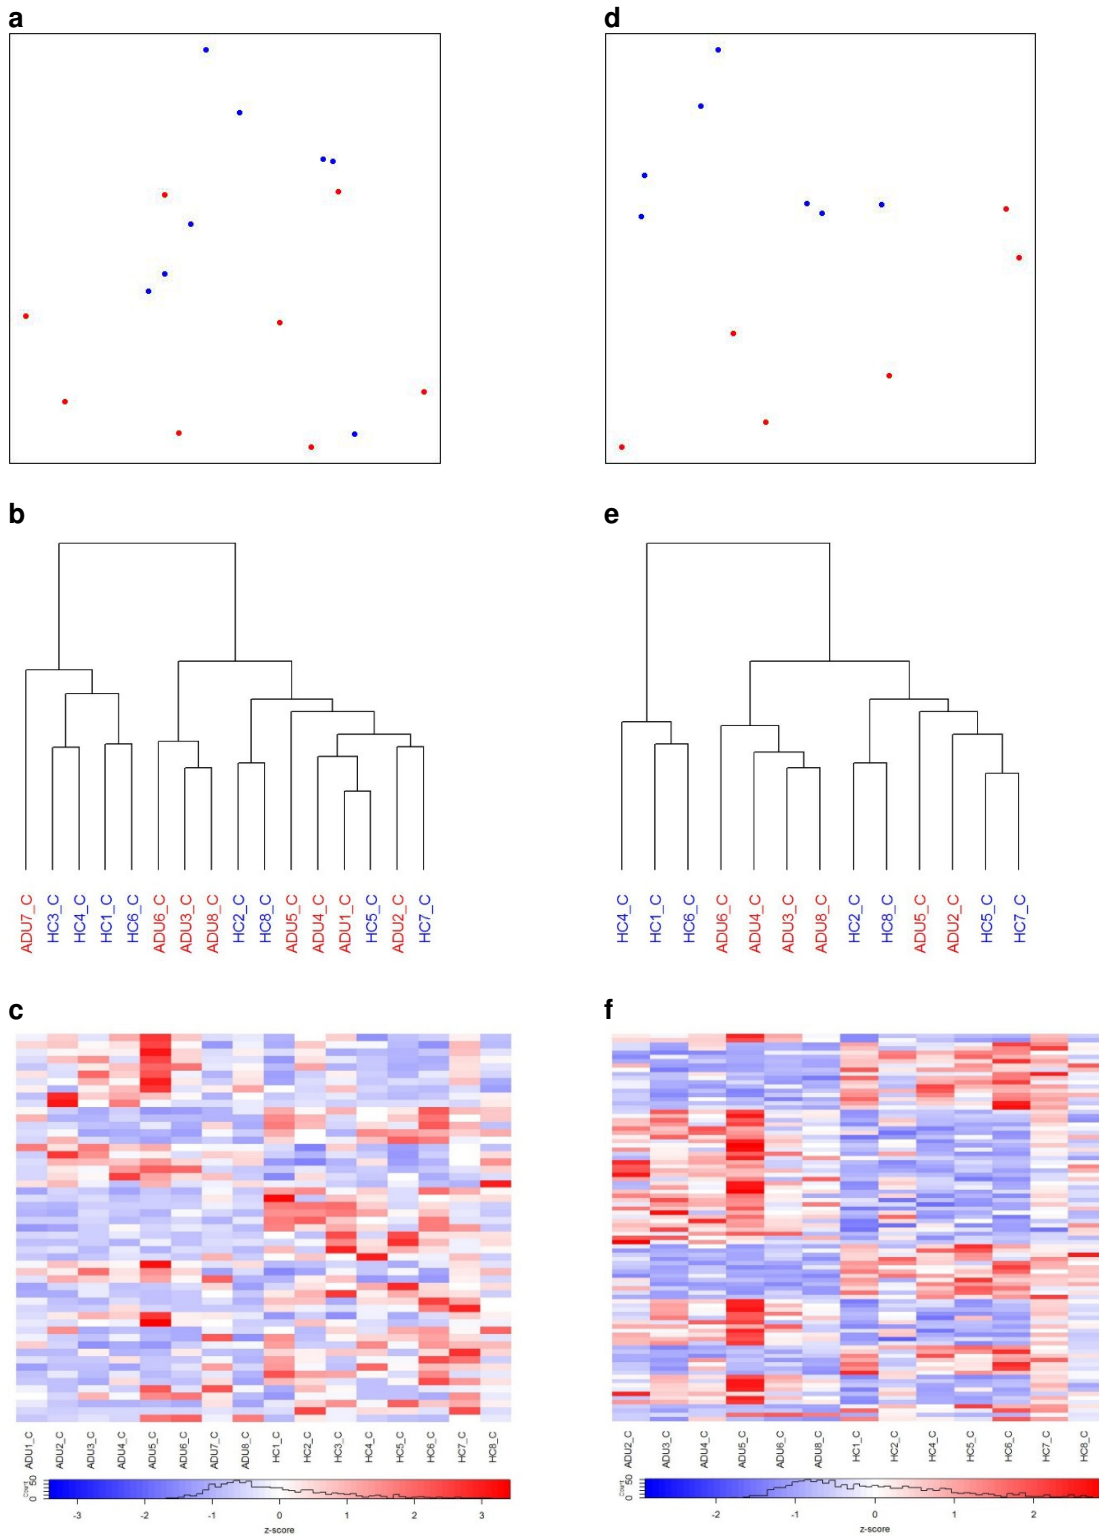

**Supplementary Figure 2.** Comparison of ADU\_C and HC\_C. Differentially expressed genes (DEG) analysis before and after two ADU\_C and one HC\_C samples removal are represented by left and right column respectively. **(a, d)** Multidimensional scaling plots over gene expressions show two clusters representing ADU\_C and HC\_C samples after outlier removal. Hierarchical clustering before **(b)** and after **(e)** outlier removal exhibits distinguishable sub-clusters formed corresponding to samples of ADU\_C and HC\_C group. Heatmap for **(c)** DEG using voom only and **(f)** DEG using voom with sample quality weighting that discovered more DEG.

**a**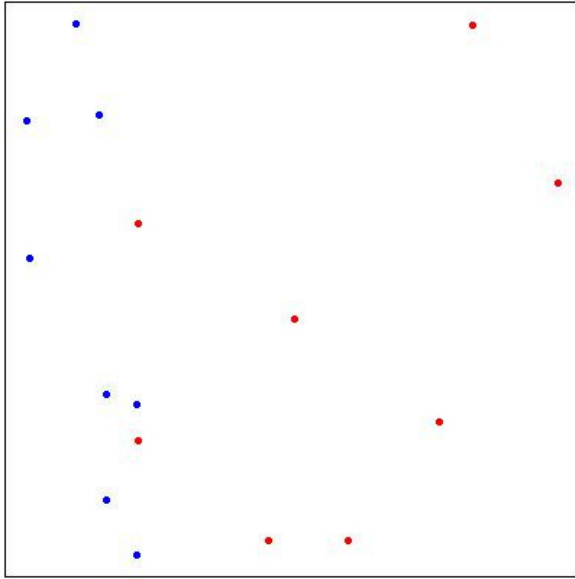**b**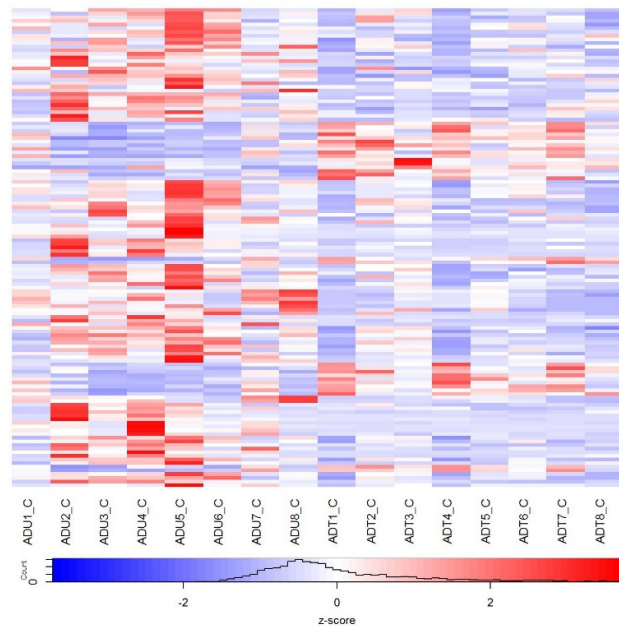

**Supplementary Figure 3.** Comparison of ADU\_C and ADT\_C. **(a)** Multidimensional scaling plots over gene expressions show two separable clusters representing ADU\_C and ADT\_C samples. **(b)** Heatmap for differentially expressed genes at  $p\text{-value} \leq 0.01$  and  $\text{fold change} \geq 2$ , detected using voom with sample quality weighting.

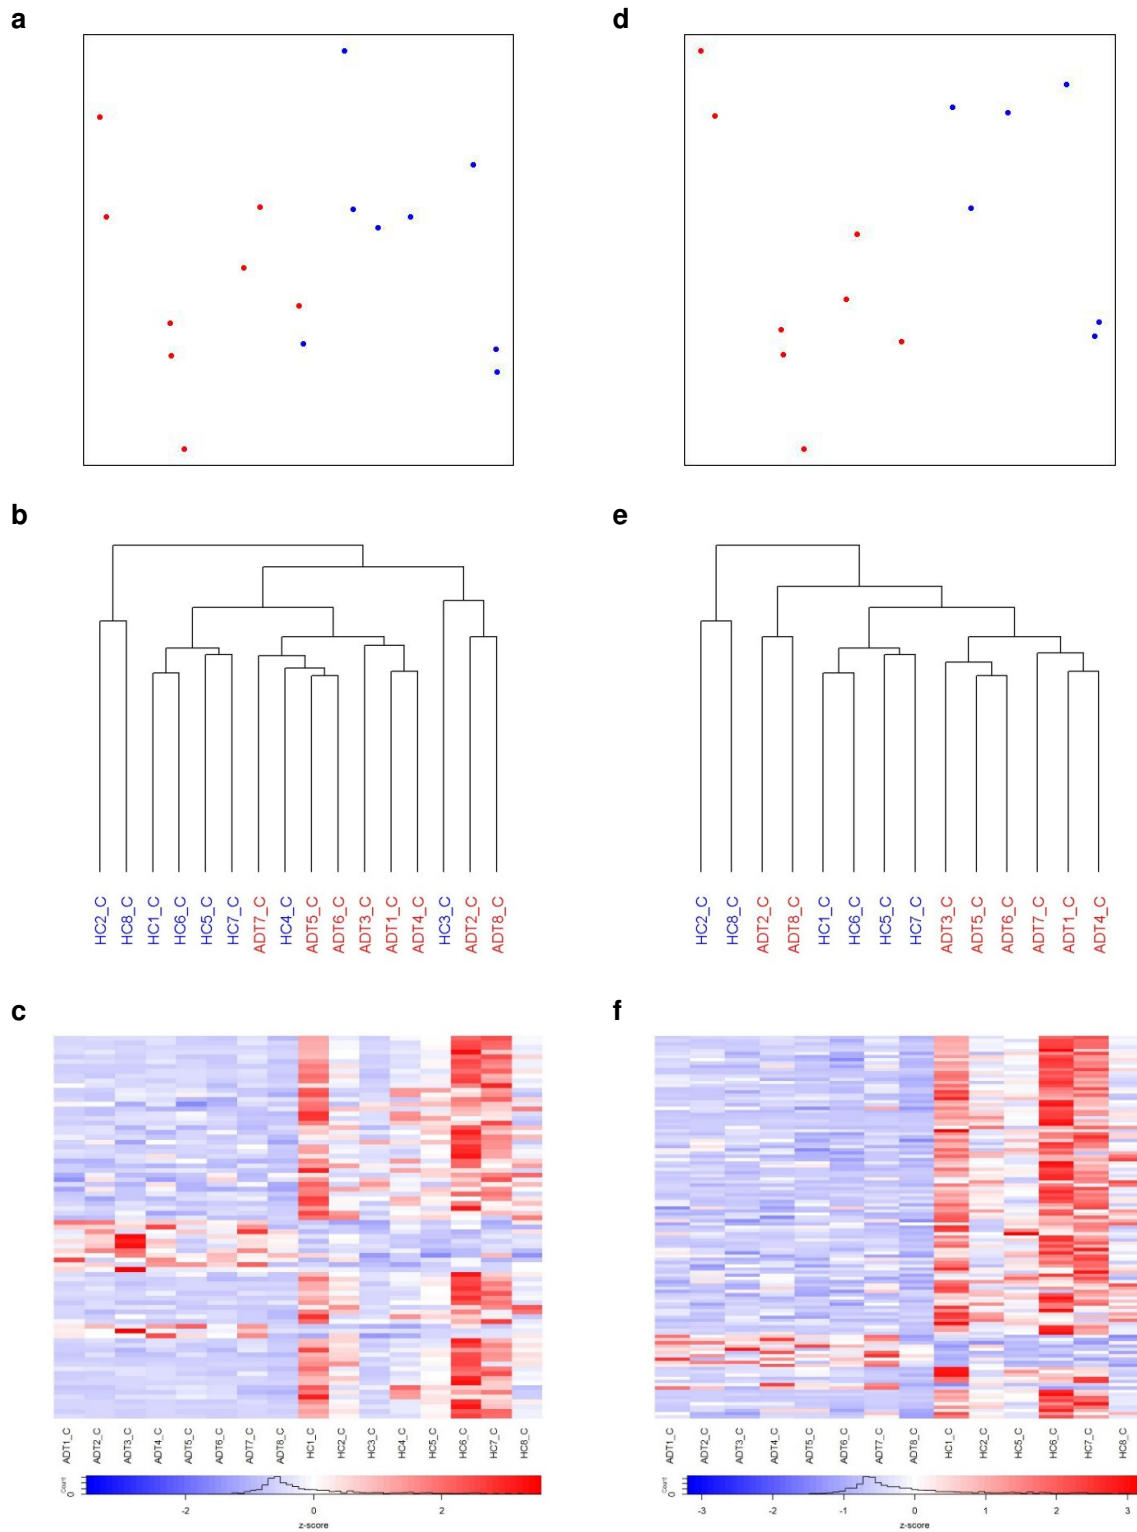

**Supplementary Figure 4.** Comparison of ADT\_C and HC\_C. Analysis before and after two HC\_C samples removal are represented by left and right column respectively. **(a,d)** Multidimensional scaling plots over gene expressions show two well separable clusters representing ADT\_C and HC\_C samples after outlier removal. **(b)** Hierarchical clustering displays two HC\_C samples (outliers) grouped into ADT\_C cluster and **(c)** Hierarchical clustering after outlier removal exhibits distinguishable sub-clusters formed corresponding to ADT\_C and HC\_C group. Heatmap for **(c)** 81 DEGs before removing outliers and **(f)** 119 DEGs after removing outliers with adjusted  $p$ -value  $\leq 0.01$  and fold change  $\geq 2$ , detected using voom with sample quality weighting.

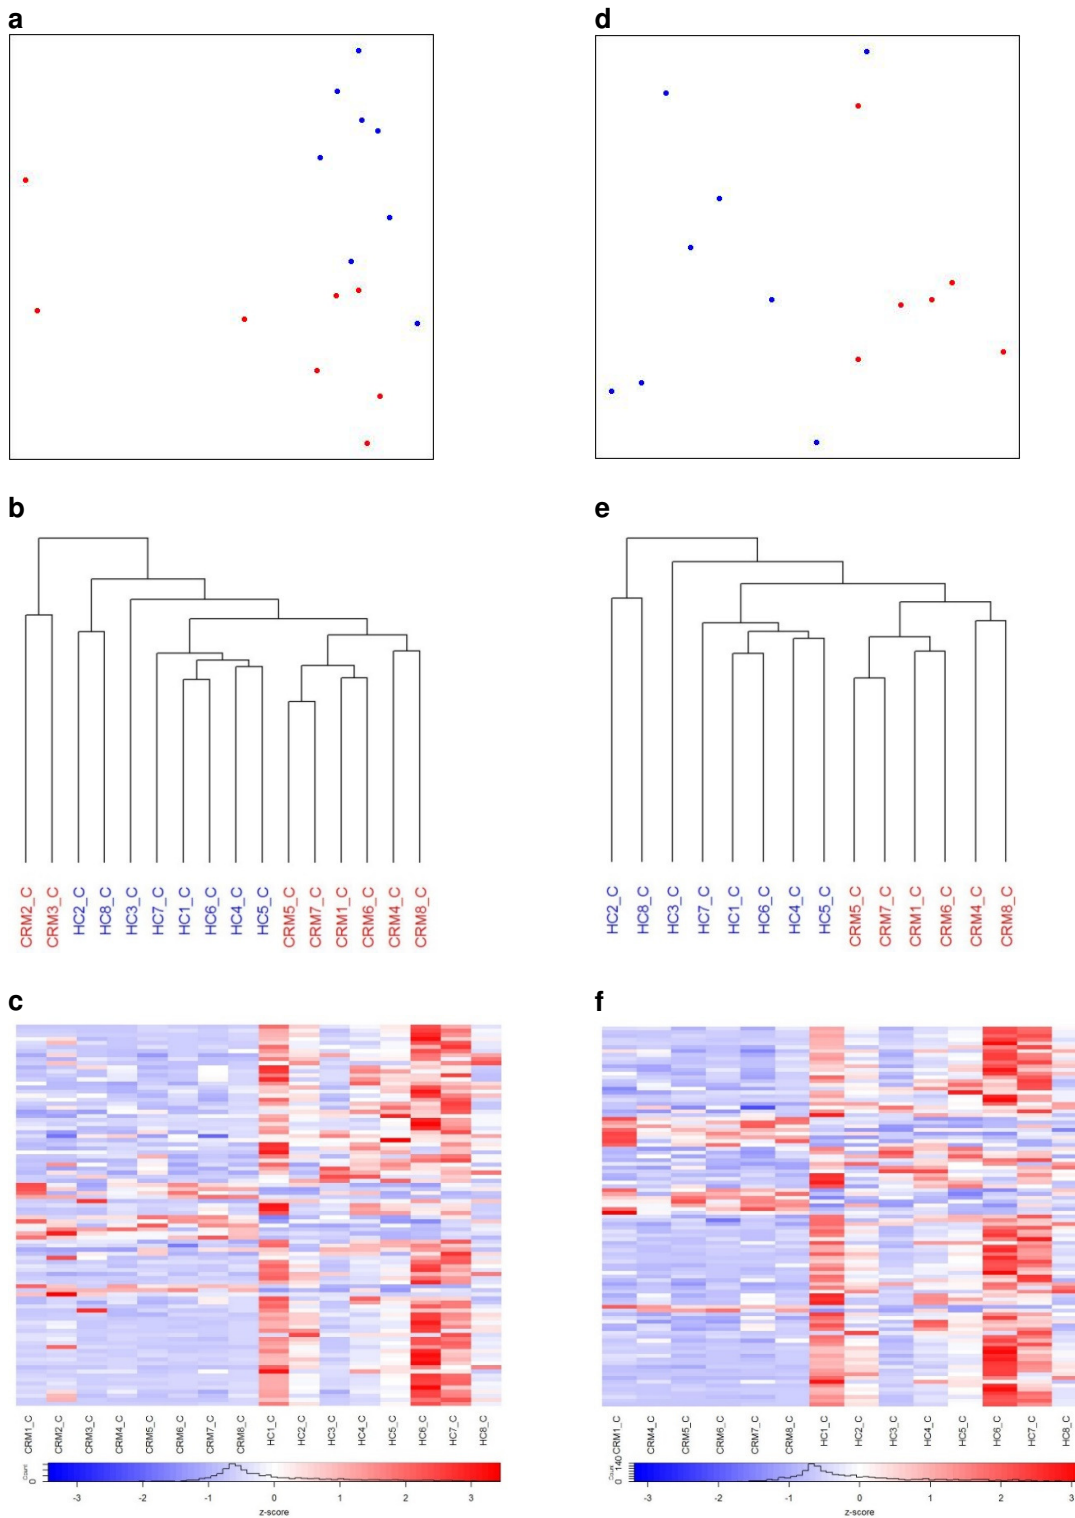

**Supplementary Figure 5.** Comparison of CRM\_C and HC\_C. Analysis before and after two CRM\_C samples removal are represented by left and right column respectively. **(a, d)** Multidimensional scaling plots over gene expressions show two well separable clusters representing CRM\_C and HC\_C samples after outlier removal. Hierarchical clustering **(b)** before and **(e)** after outlier removal. Heatmap for **(c)** 94 DEGs before outlier removal, **(f)** 101 DEGs after outlier removal at threshold of  $p\text{-value} \leq 0.01$  and fold change  $\geq 2$ , detected using voom with sample quality weighting.

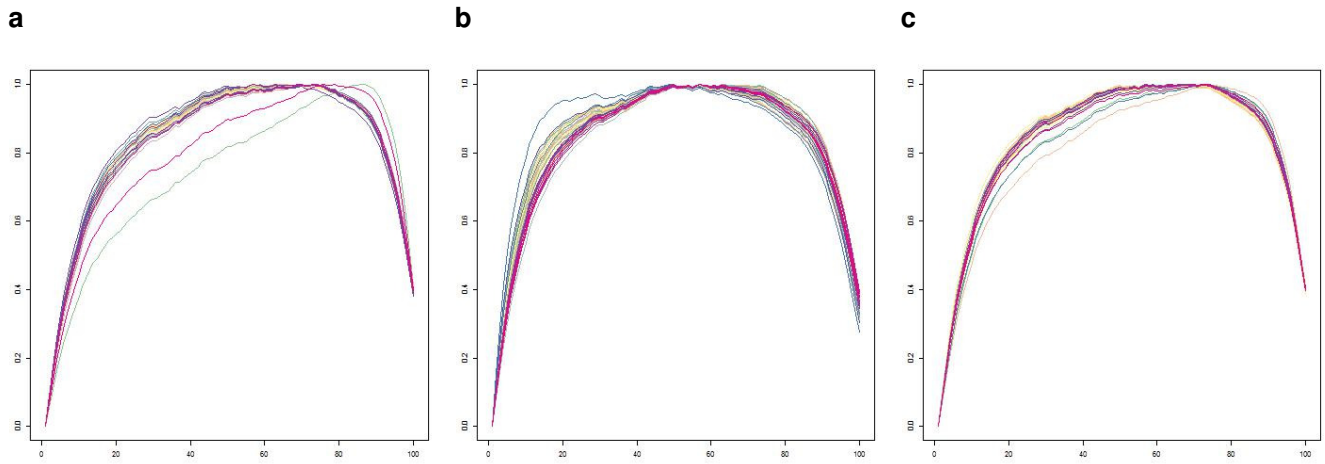

**Supplementary Figure 6.** Gene body coverage for samples from (a) cohort A, (b) cohort B and (c) cohort C. Vertical axis represents read coverage for each nucleotide position (horizontal axis) of all genes normalized to 100 bins and each sample is shown by colored line. Uniformity in gene body coverage amongst samples of all cohorts, as note that two cohort A samples display 5' bias tendencies.

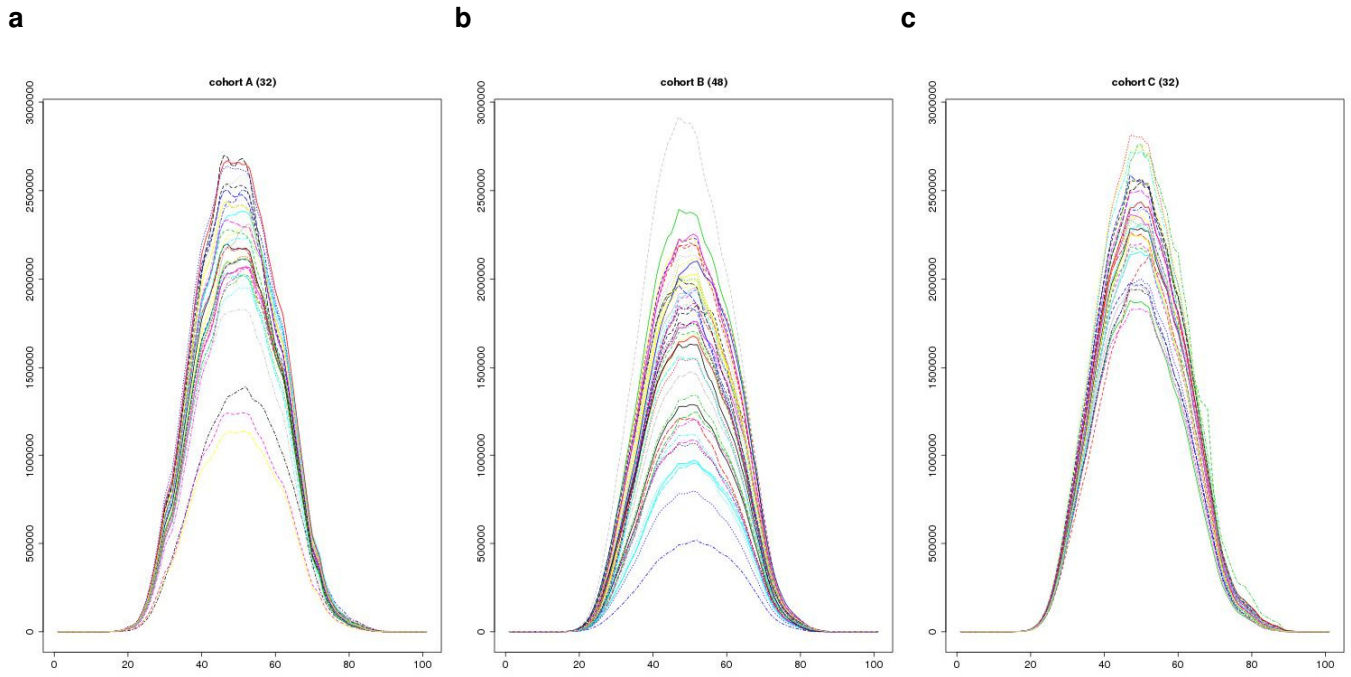

**Supplementary Figure 7.** GC content distribution for samples from (a) cohort A, (b) cohort B and (c) cohort C. Vertical axis indicates number of reads corresponding to percentage of GC content represent by horizontal axis. All cohorts exhibit normal distribution for GC content, peaks at the expected 40-50% range.



|                 | <b>cuffdiff2</b> | <b>deseq2</b> | <b>EBSeq</b> | <b>edgeR</b> | <b>voom</b> | <b>voom+weight</b> |
|-----------------|------------------|---------------|--------------|--------------|-------------|--------------------|
| <b>Cohort A</b> |                  |               |              |              |             |                    |
| cuffdiff2       | 35               | 1             | 0            | 1            | 3           | 6                  |
| deseq2          |                  | 3             | 0            | 1            | 0           | 0                  |
| EBSeq           |                  |               | 1            | 0            | 0           | 0                  |
| edgeR           |                  |               |              | 2            | 2           | 2                  |
| voom            |                  |               |              |              | 8           | 7                  |
| voom+weight     |                  |               |              |              |             | 17                 |
| <b>Cohort B</b> |                  |               |              |              |             |                    |
| cuffdiff2       | 26               | 0             | 6            | 9            | 1           | 1                  |
| deseq2          |                  | 6             | 0            | 4            | 1           | 1                  |
| EBSeq           |                  |               | 11           | 8            | 0           | 0                  |
| edgeR           |                  |               |              | 31           | 2           | 2                  |
| voom            |                  |               |              |              | 11          | 8                  |
| voom+weight     |                  |               |              |              |             | 11                 |
| <b>Cohort C</b> |                  |               |              |              |             |                    |
| cuffdiff2       | 63               | 0             | 0            | 1            | 5           | 3                  |
| deseq2          |                  | 3             | 0            | 0            | 0           | 0                  |
| EBSeq           |                  |               | 71           | 0            | 0           | 0                  |
| edgeR           |                  |               |              | 4            | 1           | 1                  |
| voom            |                  |               |              |              | 19          | 10                 |
| voom+weight     |                  |               |              |              |             | 14                 |

**Supplementary Table 1.** Number of differentially expressed genes for the comparison of ADT and CRM. Number of common differentially expressed genes between pair method is represented by method from row and column.

| <b>DEG tool</b> | <b>Normalization method</b> | <b>Expression calculation</b> | <b>Alignment tool</b> |
|-----------------|-----------------------------|-------------------------------|-----------------------|
| cuffdiff2       | geometric                   | FPKM                          | TopHat                |
| deseq2          | TMM                         | Htseq-count                   | TopHat                |
| EBSeq           | Median                      | RSEM                          | STAR                  |
| edgeR           | TMM                         | Htseq-count                   | TopHat                |
| voom            | TMM                         | Htseq-count                   | TopHat                |
| voom+weight     | TMM                         | Htseq-count                   | TopHat                |

TMM: trimmed mean of M-values, FPKM: fragment per kilobase read length per million mapped read

**Supplementary Table 2.** Description of differentially expressed genes analysis methods for ADT versus CRM

| <b>Gender</b> | <b>Age (Years)</b> | <b>Medications</b> |
|---------------|--------------------|--------------------|
| <b>ADU_A</b>  |                    |                    |
| F             | 4                  | NA                 |
| F             | 3                  | NA                 |
| F             | 16                 | NA                 |
| F             | 11                 | NA                 |
| F             | 7                  | NA                 |
| F             | 9                  | NA                 |
| F             | 7                  | NA                 |
| F             | 8                  | NA                 |
| <b>ADT_A</b>  |                    |                    |
| F             | 9                  | MTX                |
| F             | 4                  | MTX                |
| F             | 3                  | MTX                |
| F             | 7                  | MTX                |
| F             | 7                  | MTX                |
| F             | 12                 | MTX, infliximab    |
| F             | 5                  | MTX                |
| F             | 5                  | MTX                |
| <b>CRM_A</b>  |                    |                    |
| M             | 10                 | MTX                |
| F             | 12                 | MTX                |
| F             | 11                 | MTX                |
| F             | 14                 | MTX, etanercept    |
| F             | 10                 | MTX, etanercept    |
| F             | 10                 | MTX, etanercept    |
| F             | 8                  | MTX, etanercept    |
| F             | 9                  | MTX                |
| <b>HC_A</b>   |                    |                    |
| F             | 14                 | NA                 |
| F             | 9                  | NA                 |
| F             | 7                  | NA                 |
| F             | 11                 | NA                 |
| F             | 7                  | NA                 |
| F             | 10                 | NA                 |
| F             | 12                 | NA                 |
| F             | 13                 | NA                 |

**Supplementary Table 3a.** Cohort A sample information. MTX: methotrexate, NA: not applicable/available

| <b>Gender</b> | <b>Age (Years)</b> | <b>Medications</b> |                 | <b>Interval between sample</b> |
|---------------|--------------------|--------------------|-----------------|--------------------------------|
| <b>ADT_B</b>  |                    | <b>ADT_B1</b>      | <b>ADT_B2</b>   |                                |
| F             | 7                  | MTX, etanercept    | MTX, etanercept | 4 months                       |
| F             | 5                  | MTX, infliximab    | MTX, infliximab | 4 months                       |
| F             | 11                 | MTX, etanercept    | MTX, etanercept | 5 months                       |
| F             | 8                  | MTX, etanercept    | MTX, etanercept | 4 months                       |
| F             | 5                  | MTX                | MTX             | 2.5 months                     |
| F             | 12                 | MTX                | MTX             | 5 weeks                        |
| M             | 3                  | MTX                | MTX             | 3 months                       |
| F             | 4                  | MTX                | MTX             | 6 weeks                        |
| <b>CRM_B</b>  |                    | <b>CRM_B1</b>      | <b>CRM_B2</b>   |                                |
| F             | 15                 | MTX                | MTX             | 3 months                       |
| F             | 9                  | Etanercept         | Etanercept      | 5 months                       |
| M             | 9                  | Etanercept         | Etanercept      | 5 months                       |
| M             | 13                 | MTX, etanercept    | MTX, etanercept | 5 months                       |
| F             | 11                 | MTX, naproxen      | MTX, naproxen   | 4 months                       |
| F             | 10                 | MTX, etanercept    | MTX, etanercept | 4 months                       |
| M             | 15                 | MTX, etanercept    | MTX, etanercept | 4 months                       |
| F             | 7                  | Etanercept         | Etanercept      | 7 months                       |
| M             | 8                  | MTX, etanercept    | MTX, etanercept | 6 months                       |
| F             | 16                 | MTX, etanercept    | MTX, etanercept | 4 months                       |

**Supplementary Table 3b.** Cohort B sample information. MTX: methotrexate

| <b>Gender</b> | <b>Age (Years)</b> | <b>Medications</b> |
|---------------|--------------------|--------------------|
| <b>ADU_C</b>  |                    |                    |
| F             | 16                 | NA                 |
| F             | 11                 | NA                 |
| F             | 10                 | NA                 |
| F             | 6                  | NA                 |
| F             | 2                  | NA                 |
| F             | 15                 | NA                 |
| F             | 7                  | NA                 |
| F             | 16                 | NA                 |
| <b>ADT_C</b>  |                    |                    |
| F             | 12                 | NA                 |
| M             | 12                 | NA                 |
| F             | 7                  | NA                 |
| F             | 6                  | NA                 |
| M             | 12                 | NA                 |
| F             | 7                  | NA                 |
| NA            | NA                 | NA                 |
| F             | 7                  | NA                 |
| <b>CRM_C</b>  |                    |                    |
| M             | 14                 | Methotrexate       |
| F             | 9                  | Methotrexate       |
| F             | 18                 | NA                 |
| F             | 15                 | Methotrexate       |
| NA            | NA                 | IL1 inhibitor      |
| M             | 16                 | Etanercept         |
| M             | 13                 | Methotrexate       |
| F             | 14                 | Methotrexate       |
| <b>HC_C</b>   |                    |                    |
| F             | 13                 | NA                 |
| F             | 8                  | NA                 |
| F             | 16                 | NA                 |
| F             | 4                  | NA                 |
| F             | 9                  | NA                 |
| F             | 15                 | NA                 |
| F             | 16                 | NA                 |
| F             | 14                 | NA                 |

**Supplementary Table 3c.** Cohort C sample information. MTX: methotrexate, NA: not applicable/available

| Method                  | FC  | APV    |
|-------------------------|-----|--------|
| <b>ADT_B1 vs ADT_B2</b> |     |        |
| cuffdiff2               | 2   | 0.05   |
| deseq2                  | 1.2 | 0.10*  |
| EBSeq                   | 2   | 0.10   |
| edgeR                   | 2   | 0.05   |
| voom                    | 2   | 0.05*  |
| voom+weight             | 2   | 0.05*  |
| <b>CRM_B1 vs CRM_B2</b> |     |        |
| cuffdiff2               | 2   | 0.05   |
| deseq2                  | 2   | 0.001* |
| EBSeq                   | 2   | 0.05*  |
| edgeR                   | 2   | 0.001* |
| voom                    | 2   | 0.05*  |
| voom+weight             | 2   | 0.01*  |

FC: fold change, APV: adjusted p-value, \*: p-value as cutoff

**Supplementary Table 4a.** Setting for differentially expressed genes identification by different methods for the comparison of two time points cohort B samples.

|                         | cuffdiff2 | deseq2 | EBSeq | edgeR | voom | voom+weight |
|-------------------------|-----------|--------|-------|-------|------|-------------|
| <b>ADT_B1 vs ADT_B2</b> |           |        |       |       |      |             |
| cuffdiff2               | 19        | 0      | 0     | 2     | 2    | 0           |
| deseq2                  |           | 12     | 0     | 0     | 1    | 0           |
| EBSeq                   |           |        | 1     | 0     | 0    | 0           |
| edgeR                   |           |        |       | 11    | 0    | 0           |
| voom                    |           |        |       |       | 2    | 0           |
| voom+weight             |           |        |       |       |      | 6           |
| <b>CRM_B1 vs CRM_B2</b> |           |        |       |       |      |             |
| cuffdiff2               | 17        | 0      | 0     | 3     | 1    | 0           |
| deseq2                  |           | 3      | 0     | 2     | 1    | 1           |
| EBSeq                   |           |        | 0     | 0     | 0    | 0           |
| edgeR                   |           |        |       | 13    | 2    | 1           |
| voom                    |           |        |       |       | 2    | 1           |
| voom+weight             |           |        |       |       |      | 1           |

**Supplementary Table 4b.** Number of differentially expressed genes for the comparison over two time points for samples from cohort B ADT and CRM group. Number of common differentially expressed genes between pair method is represented by method from row and column.

|         | <b>Cohort A</b> |              | <b>Cohort B</b> |              | <b>Cohort C</b> |              |
|---------|-----------------|--------------|-----------------|--------------|-----------------|--------------|
|         | Mapping rate    | Mapped reads | Mapping rate    | Mapped reads | Mapping rate    | Mapped reads |
| Average | 86.58           | 41,593,196   | 90.49           | 35,464,982   | 83.78           | 50,828,966   |
| Maximum | 90.10           | 52,056,978   | 92.90           | 59,751,220   | 85.50           | 60,591,196   |
| Minimum | 78.00           | 22,557,546   | 75.10           | 10,588,944   | 78.80           | 40,001,700   |

**Supplementary Table 5.** RNA sequencing reads mapping to UCSC hg19 human reference genome

| <b>Number of raw reads</b>       | <b>Cohort A</b> | <b>Cohort B</b> | <b>Cohort C</b> |
|----------------------------------|-----------------|-----------------|-----------------|
| Number of sample, n              | 32              | 19 pairs        | 32              |
| Average                          | 62,262,707      | 52,106,104      | 74,263,403      |
| Maximum                          | 76,363,956      | 88,661,806      | 87,736,850      |
| Minimum                          | 50,392,008      | 15,608,508      | 60,709,052      |
| Range                            | 25,971,948      | 73,053,298      | 27,027,798      |
| Coefficient Of Variance, COV (%) | 10.059          | 28.693          | 9.916           |

COV= Average/Standard deviation\*100%

**Supplementary Table 6.** Pre-alignment sequencing reads



|                 | <b>Exons</b> | <b>Intron</b> | <b>TSS up 10k</b> | <b>TES down 10k</b> |
|-----------------|--------------|---------------|-------------------|---------------------|
| <b>Cohort A</b> |              |               |                   |                     |
| Average         | 77.608       | 18.038        | 1.289             | 3.065               |
| Maximum         | 82.923       | 25.047        | 1.560             | 3.528               |
| Minimum         | 70.564       | 12.701        | 0.966             | 2.489               |
| <b>Cohort B</b> |              |               |                   |                     |
| Average         | 77.212       | 19.219        | 0.976             | 2.594               |
| Maximum         | 79.711       | 23.383        | 1.101             | 2.829               |
| Minimum         | 72.892       | 16.841        | 0.873             | 2.314               |
| <b>Cohort C</b> |              |               |                   |                     |
| Average         | 78.249       | 17.246        | 1.240             | 3.265               |
| Maximum         | 81.049       | 21.665        | 2.238             | 4.720               |
| Minimum         | 74.160       | 14.506        | 1.046             | 2.756               |

TSS: transcription start site, TES: transcription end site

**Supplementary Table 7.** Genomic distribution of sequencing reads in percentage
